# Supplementary material
Source: PubMed Central journal article supplement (PMC6902162)
Supplement: jamapsychiatry-77-155-s001.pdf [file jamapsychiatry-77-155-s001.pdf]

## Supplementary Online Content

Dalsgaard S, Thorsteinsson E, Trabjerg BB, et al. Incidence rates and cumulative incidences of the full spectrum of diagnosed mental disorders in childhood and adolescence. *JAMA Psychiatry*. Published online November 20, 2019. doi:10.1001/jamapsychiatry.2019.3523

**eTable 1.** No. of New Cases With Mental Disorders in the Total Cohort and Their Contributing Time of Observation During Follow-up, Stratified by Sex

**eTable 2.** Cumulative Incidences of Mental Disorders by 13 Years of Age, in a Nationwide Cohort

**eTable 3.** Cumulative Incidences of Selected Mental Disorders by 6 Years of Age, in a Nationwide Cohort

**eTable 4.** Sensitivity Analyses of Cumulative Incidences of Mental Disorders by 13 Years of Age, in a Subset of Cohorts Including Only Individuals Born 1995-2003

**eFigure 1.** Sex- and Age-Specific Incidence Rates and Cumulative Incidences for Organic Mental Disorders, Substance Use Disorders, Alcohol Abuse, and Cannabis Use

**eFigure 2.** Sex- and Age-Specific Incidence Rates and Cumulative Incidences for Schizophrenia, Acute Psychoses, Bipolar Disorder, and Depressive Episode

**eFigure 3.** Sex- and Age-Specific Incidence Rates and Cumulative Incidences for Anorexia Nervosa, Bulimia, Personality Disorders, and Other Developmental Disorders

**eFigure 4.** Sex- and Age-Specific Incidence Rates and Cumulative Incidences for Childhood Autism, Asperger Syndrome, ADHD-Combined Type, and Attachment Disorders

This supplementary material has been provided by the authors to give readers additional information about their work.

| <b>eTable 1. No. of New Cases With Mental Disorders in the Total Cohort<sup>a</sup> and Their Contributing Time of Observation During Follow-up, Stratified by Sex</b>                                                                                                                              |  |                                          |              |                                          |              |
|-----------------------------------------------------------------------------------------------------------------------------------------------------------------------------------------------------------------------------------------------------------------------------------------------------|--|------------------------------------------|--------------|------------------------------------------|--------------|
|                                                                                                                                                                                                                                                                                                     |  | <b>No. of incident cases<sup>b</sup></b> |              | <b>Time of observation, person-years</b> |              |
| <b>Diagnostic group</b>                                                                                                                                                                                                                                                                             |  | <b>Females</b>                           | <b>Males</b> | <b>Females</b>                           | <b>Males</b> |
| Any mental disorder                                                                                                                                                                                                                                                                                 |  | 41 350                                   | 58 576       | 7 070 071                                | 7 321 732    |
| Organic mental disorders                                                                                                                                                                                                                                                                            |  | 179                                      | 234          | 7 285 525                                | 7 683 161    |
| Substance use disorders                                                                                                                                                                                                                                                                             |  | 2 897                                    | 3 225        | 7 273 401                                | 7 670 391    |
| Alcohol abuse                                                                                                                                                                                                                                                                                       |  | 1 874                                    | 2 077        | 7 278 523                                | 7 676 009    |
| Cannabis use                                                                                                                                                                                                                                                                                        |  | 558                                      | 765          | 7 284 321                                | 7 681 795    |
| Schizophrenia spectrum disorder                                                                                                                                                                                                                                                                     |  | 1 569                                    | 1 109        | 7 280 736                                | 7 679 897    |
| Schizophrenia                                                                                                                                                                                                                                                                                       |  | 360                                      | 250          | 7 284 899                                | 7 683 468    |
| Acute psychoses                                                                                                                                                                                                                                                                                     |  | 346                                      | 274          | 7 285 086                                | 7 683 367    |
| Mood disorders                                                                                                                                                                                                                                                                                      |  | 5 047                                    | 2 349        | 7 268 231                                | 7 675 281    |
| Bipolar disorder                                                                                                                                                                                                                                                                                    |  | 185                                      | 129          | 7 285 748                                | 7 684 213    |
| Depressive episode                                                                                                                                                                                                                                                                                  |  | 4 793                                    | 2 147        | 7 269 334                                | 7 676 304    |
| Anxiety disorders                                                                                                                                                                                                                                                                                   |  | 19 259                                   | 14 282       | 7 204 623                                | 7 613 514    |
| OCD                                                                                                                                                                                                                                                                                                 |  | 2 432                                    | 1 927        | 7 276 498                                | 7 675 642    |
| Eating disorders                                                                                                                                                                                                                                                                                    |  | 4 297                                    | 1 132        | 7 266 196                                | 7 676 563    |
| Anorexia nervosa                                                                                                                                                                                                                                                                                    |  | 1 506                                    | 143          | 7 280 491                                | 7 684 103    |
| Bulimia                                                                                                                                                                                                                                                                                             |  | 282                                      | 9            | 7 285 385                                | 7 684 676    |
| Personality disorders                                                                                                                                                                                                                                                                               |  | 1 982                                    | 649          | 7 278 197                                | 7 681 658    |
| Intellectual disability                                                                                                                                                                                                                                                                             |  | 3 091                                    | 6 145        | 7 264 596                                | 7 640 371    |
| Other developmental disorders                                                                                                                                                                                                                                                                       |  | 4 545                                    | 10 948       | 7 262 184                                | 7 616 556    |
| Autism spectrum disorders                                                                                                                                                                                                                                                                           |  | 5 354                                    | 16 248       | 7 261 935                                | 7 593 923    |
| Childhood autism                                                                                                                                                                                                                                                                                    |  | 1 600                                    | 6 244        | 7 277 979                                | 7 648 813    |
| Asperger's syndrome                                                                                                                                                                                                                                                                                 |  | 1 260                                    | 3 814        | 7 281 269                                | 7 662 460    |
| ADHD                                                                                                                                                                                                                                                                                                |  | 8 815                                    | 21 961       | 7 245 974                                | 7 562 103    |
| ADHD-combined type                                                                                                                                                                                                                                                                                  |  | 6 995                                    | 19 290       | 7 253 527                                | 7 576 058    |
| ADHD-inattentive type                                                                                                                                                                                                                                                                               |  | 2 311                                    | 3 662        | 7 277 006                                | 7 666 200    |
| ODD/CD                                                                                                                                                                                                                                                                                              |  | 1 393                                    | 4 701        | 7 278 471                                | 7 655 160    |
| Attachment disorders                                                                                                                                                                                                                                                                                |  | 1 705                                    | 2 813        | 7 276 336                                | 7 666 547    |
| Tic disorders                                                                                                                                                                                                                                                                                       |  | 1 486                                    | 5 307        | 7 278 860                                | 7 655 735    |
| Abbreviations: OCD, obsessive-compulsive disorder; ADHD, attention-deficit/hyperactivity disorder; ODD/CD, oppositional defiant disorder/conduct disorder; ICD-10-DCR, International Classification of Mental and Behavioural Disorders, 10 <sup>th</sup> edition: Diagnostic Criteria for Research |  |                                          |              |                                          |              |
| <sup>a</sup> All individuals born in Denmark 1995-2016, followed until 18 years of age or date of death, emigration or Dec 31, 2016, whichever came first.                                                                                                                                          |  |                                          |              |                                          |              |
| <sup>b</sup> Individuals with more than one disorder were included in the numerator for each of the separate disorders.                                                                                                                                                                             |  |                                          |              |                                          |              |

| eTable 2. Cumulative Incidences of Mental Disorders by 13 Years of Age, in a Nationwide Cohort <sup>a</sup>                                                                                                |                       |        |                                               |                    |  |
|------------------------------------------------------------------------------------------------------------------------------------------------------------------------------------------------------------|-----------------------|--------|-----------------------------------------------|--------------------|--|
|                                                                                                                                                                                                            | No. of incident cases |        | Cumulative incidence (95% CI), % <sup>b</sup> |                    |  |
| Diagnostic group                                                                                                                                                                                           | Females               | Males  | Females                                       | Males              |  |
| Any mental disorder <sup>d</sup>                                                                                                                                                                           | 22 357                | 47 203 | 5.17 (5.10-5.24)                              | 10.23 (9.90-10.57) |  |
| Organic mental disorders                                                                                                                                                                                   | 81                    | 158    | 0.02 (0.01-0.02)                              | 0.04 (0.02-0.07)   |  |
| Substance use disorders                                                                                                                                                                                    | 233                   | 298    | 0.05 (0.04-0.06)                              | 0.06 (0.00-0.64)   |  |
| Alcohol abuse                                                                                                                                                                                              | 64                    | 96     | 0.02 (0.01-0.03)                              | 0.03 (0.00-1.16)   |  |
| Cannabis use                                                                                                                                                                                               | 18                    | 15     | 0.00 (0.00-0.01)                              | 0.00 (0.00-20.0)   |  |
| Schizophrenia spectrum disorder                                                                                                                                                                            | 193                   | 312    | 0.06 (0.05-0.01)                              | 0.08 (0.02-0.24)   |  |
| Schizophrenia                                                                                                                                                                                              | 15                    | 26     | 0.01 (0.00-0.01)                              | 0.01 (0.00-3.50)   |  |
| Acute psychoses                                                                                                                                                                                            | 58                    | 86     | 0.02 (0.01-0.02)                              | 0.02 (0.01-0.09)   |  |
| Mood disorders                                                                                                                                                                                             | 513                   | 716    | 0.16 (0.14-0.17)                              | 0.20 (0.07-0.47)   |  |
| Bipolar disorder                                                                                                                                                                                           | 8                     | 26     | 0.00 (0.00-0.01)                              | 0.01(0.00-2.50)    |  |
| Depressive episode                                                                                                                                                                                         | 473                   | 642    | 0.15 (0.13-0.16)                              | 0.18 (0.06-0.45)   |  |
| Anxiety disorders <sup>d</sup>                                                                                                                                                                             | 7 327                 | 9 177  | 1.88 (1.83-1.92)                              | 2.17 (1.93-2.44)   |  |
| OCD                                                                                                                                                                                                        | 1 150                 | 1 201  | 0.32 (0.30-0.34)                              | 0.31 (0.24-0.39)   |  |
| Eating disorders <sup>c</sup>                                                                                                                                                                              | 1 296                 | 874    | 0.30 (0.29-0.32)                              | 0.16 (0.08-0.31)   |  |
| Anorexia nervosa                                                                                                                                                                                           | 300                   | 67     | 0.09 (0.08-0.10)                              | 0.02 (0.00-0.20)   |  |
| Bulimia                                                                                                                                                                                                    | <5                    | <5     | -                                             | -                  |  |
| Personality disorders                                                                                                                                                                                      | 184                   | 152    | 0.05 (0.04-0.06)                              | 0.04 (0.00-0.96)   |  |
| Intellectual disability <sup>d</sup>                                                                                                                                                                       | 2 316                 | 5 129  | 0.51 (0.49-0.53)                              | 1.07 (1.01-1.13)   |  |
| Other developmental disorders <sup>d</sup>                                                                                                                                                                 | 3 190                 | 9 368  | 0.72 (0.70-0.75)                              | 2.04 (1.97-2.10)   |  |
| Autism spectrum disorders <sup>d</sup>                                                                                                                                                                     | 3 334                 | 13 194 | 0.80 (0.77-0.83)                              | 2.90 (2.81-2.99)   |  |
| Childhood autism <sup>d</sup>                                                                                                                                                                              | 1 254                 | 5 431  | 0.27 (0.26-0.29)                              | 1.12 (1.08-1.16)   |  |
| Asperger’s syndrome <sup>d</sup>                                                                                                                                                                           | 557                   | 2 777  | 0.15 (0.14-0.17)                              | 0.67 (0.61-0.74)   |  |
| ADHD <sup>d</sup>                                                                                                                                                                                          | 5 440                 | 18 216 | 1.34 (1.30-1.38)                              | 4.20 (4.08-4.33)   |  |
| ADHD-combined type <sup>d</sup>                                                                                                                                                                            | 4 570                 | 16 223 | 1.12 (1.09-1.15)                              | 3.74 (3.63-3.85)   |  |
| ADHD-inattentive type <sup>d</sup>                                                                                                                                                                         | 1 095                 | 2 669  | 0.28 (0.26-0.29)                              | 0.64 (0.58-0.70)   |  |
| ODD/CD <sup>d</sup>                                                                                                                                                                                        | 861                   | 3 780  | 0.21 (0.19-0.22)                              | 0.87 (0.83-0.92)   |  |
| Attachment disorders <sup>d</sup>                                                                                                                                                                          | 1 229                 | 2 421  | 0.28 (0.26-0.30)                              | 0.53 (0.49-0.57)   |  |
| Tic disorders <sup>d</sup>                                                                                                                                                                                 | 1 225                 | 4 718  | 0.30 (0.29-0.32)                              | 1.12 (1.07-1.16)   |  |
| Abbreviations: OCD, obsessive-compulsive disorder; ADHD, attention-deficit/hyperactivity disorder; ODD/CD, oppositional defiant disorder/conduct disorder.                                                 |                       |        |                                               |                    |  |
| <sup>a</sup> All individuals born in Denmark 1995-2016, followed until 13 years of age or date of death, emigration or Dec 31, 2016, whichever came first.                                                 |                       |        |                                               |                    |  |
| <sup>b</sup> Measures the probability of being treated for the disorder before 13 years of age. Individuals with more than one disorder were included in the numerator for each of the separate disorders. |                       |        |                                               |                    |  |
| <sup>c</sup> Males had higher probability of being diagnosed with the disorder by 13 years of age, than females                                                                                            |                       |        |                                               |                    |  |
| <sup>d</sup> Females had higher probability of being diagnosed with the disorder by 13 years of age, than males                                                                                            |                       |        |                                               |                    |  |

| eTable 3. Cumulative Incidences of Selected Mental Disorders by 6 Years of Age, in a Nationwide Cohort <sup>a</sup>                                                                                         |                       |        |                                               |                  |
|-------------------------------------------------------------------------------------------------------------------------------------------------------------------------------------------------------------|-----------------------|--------|-----------------------------------------------|------------------|
|                                                                                                                                                                                                             | No. of incident cases |        | Cumulative incidence (95% CI), % <sup>b</sup> |                  |
| Diagnostic group                                                                                                                                                                                            | Females               | Males  | Females                                       | Males            |
| Any mental disorder <sup>c,d</sup>                                                                                                                                                                          | 7 142                 | 14 397 | 1.45 (1.42-1.49)                              | 2.78 (2.44-3.15) |
| Anxiety disorders                                                                                                                                                                                           | 1 327                 | 1 620  | 0.27 (0.26-0.29)                              | 0.31 (0.13-0.67) |
| Neurodevelopmental disorders                                                                                                                                                                                |                       |        |                                               |                  |
| Intellectual disability <sup>d</sup>                                                                                                                                                                        | 1 097                 | 2 289  | 0.22 (0.21-0.24)                              | 0.44 (0.39-0.50) |
| Other developmental disorders <sup>d</sup>                                                                                                                                                                  | 1 102                 | 3 062  | 0.22 (0.21-0.24)                              | 0.59 (0.54-0.65) |
| Autism spectrum disorders <sup>d</sup>                                                                                                                                                                      | 1 056                 | 4 181  | 0.22 (0.20-0.23)                              | 0.81 (0.73-0.89) |
| Childhood autism <sup>d</sup>                                                                                                                                                                               | 564                   | 2 450  | 0.12 (0.11-0.13)                              | 0.47 (0.44-0.51) |
| ADHD <sup>d</sup>                                                                                                                                                                                           | 943                   | 3 134  | 0.19 (0.18-0.21)                              | 0.61 (0.50-0.73) |
| ADHD-combined type <sup>d</sup>                                                                                                                                                                             | 753                   | 2 704  | 0.15 (0.14-0.17)                              | 0.52 (0.43-0.63) |
| ADHD-inattentive type <sup>d</sup>                                                                                                                                                                          | 207                   | 496    | 0.04 (0.04-0.05)                              | 0.10 (0.05-0.17) |
| ODD/CD <sup>d</sup>                                                                                                                                                                                         | 201                   | 702    | 0.04 (0.04-0.05)                              | 0.14 (0.11-0.18) |
| Attachment disorders <sup>d</sup>                                                                                                                                                                           | 398                   | 707    | 0.08 (0.07-0.09)                              | 0.14 (0.11-0.18) |
| Tic disorders <sup>d</sup>                                                                                                                                                                                  | 177                   | 584    | 0.04 (0.03-0.04)                              | 0.11 (0.09-0.14) |
| Abbreviations: ADHD, attention-deficit/hyperactivity disorder; ODD/CD, oppositional defiant disorder/conduct disorder.                                                                                      |                       |        |                                               |                  |
| <sup>a</sup> All individuals born in Denmark 1995-2010, followed until six years of age or Dec 31, 2016, whichever came first.                                                                              |                       |        |                                               |                  |
| <sup>b</sup> Measures the probability of being treated for the disorder before six years of age. Individuals with more than one disorder were included in the numerator for each of the separate disorders. |                       |        |                                               |                  |
| <sup>c</sup> In this sample, 2.13% (2.11-2.16%) were diagnosed with a mental disorder before six years of age (n= 21 539).                                                                                  |                       |        |                                               |                  |
| <sup>d</sup> Males had higher probability of being diagnosed with the disorder by six years of age, than females                                                                                            |                       |        |                                               |                  |

| eTable 4. Sensitivity Analyses of Cumulative Incidences of Mental Disorders by 13 Years of Age, in a Subset of Cohorts Including Only Individuals Born 1995-2003 <sup>a</sup>                                          |  |                       |        |  |                                               |                   |
|------------------------------------------------------------------------------------------------------------------------------------------------------------------------------------------------------------------------|--|-----------------------|--------|--|-----------------------------------------------|-------------------|
|                                                                                                                                                                                                                        |  | No. of incident cases |        |  | Cumulative incidence (95% CI), % <sup>b</sup> |                   |
| Diagnostic group                                                                                                                                                                                                       |  | Females               | Males  |  | Females                                       | Males             |
| Any mental disorder                                                                                                                                                                                                    |  | 13 028                | 27 738 |  | 4.64 (4.56-4.72)*                             | 9.36 (9.01-9.70)* |
| Organic mental disorders                                                                                                                                                                                               |  | 46                    | 114    |  | 0.02 (0.01-0.02)                              | 0.04 (0.02-0.08)  |
| Substance use disorders                                                                                                                                                                                                |  | 140                   | 178    |  | 0.05 (0.04-0.06)                              | 0.06 (0.002-0.65) |
| Alcohol abuse                                                                                                                                                                                                          |  | 56                    | 86     |  | 0.02 (0.02-0.03)                              | 0.03 (0.00-0.99)  |
| Cannabis use                                                                                                                                                                                                           |  | 8                     | 9      |  | 0.00 (0.00-0.01)                              | 0.00 (0.00-27.02) |
| Schizophrenia spectrum disorder                                                                                                                                                                                        |  | 142                   | 234    |  | 0.05 (0.04-0.06)                              | 0.08 (0.02-0.24)  |
| Schizophrenia                                                                                                                                                                                                          |  | 14                    | 20     |  | 0.01 (0.00-0.01)                              | 0.01 (0.00-3.52)  |
| Acute psychoses                                                                                                                                                                                                        |  | 46                    | 71     |  | 0.02 (0.01-0.02)                              | 0.02 (0.01-0.09)  |
| Mood disorders                                                                                                                                                                                                         |  | 450                   | 577    |  | 0.16 (0.15-0.18)                              | 0.19 (0.06-0.47)  |
| Bipolar disorder                                                                                                                                                                                                       |  | 6                     | 16     |  | 0.00 (0.00-0.01)                              | 0.01 (0.00-4.08)  |
| Depressive episode                                                                                                                                                                                                     |  | 416                   | 518    |  | 0.15 (0.14-0.16)                              | 0.18 (0.06-0.45)  |
| Anxiety disorders                                                                                                                                                                                                      |  | 4 635                 | 5 555  |  | 1.65 (1.60-1.70)*                             | 1.87 (1.63-2.14)  |
| OCD                                                                                                                                                                                                                    |  | 821                   | 866    |  | 0.29 (0.27-0.31)                              | 0.29 (0.22-0.38)  |
| Eating disorders                                                                                                                                                                                                       |  | 843                   | 424    |  | 0.30 (0.28-0.32)                              | 0.14 (0.06-0.30)  |
| Anorexia nervosa                                                                                                                                                                                                       |  | 274                   | 52     |  | 0.10 (0.09-0.11)                              | 0.02 (0.00-0.22)  |
| Bulimia                                                                                                                                                                                                                |  | <5                    | 0      |  | -                                             | -                 |
| Personality disorders                                                                                                                                                                                                  |  | 134                   | 104    |  | 0.05 (0.04-0.06)                              | 0.04 (0.00-0.96)  |
| Intellectual disability                                                                                                                                                                                                |  | 1 517                 | 3 316  |  | 0.54 (0.51-0.57)                              | 1.12 (1.05-1.19)  |
| Other developmental disorders                                                                                                                                                                                          |  | 1 714                 | 5 520  |  | 0.61 (0.58-0.64)*                             | 1.86 (1.79-1.93)  |
| Autism spectrum disorders                                                                                                                                                                                              |  | 1 806                 | 7 297  |  | 0.64 (0.61-0.67)*                             | 2.46 (2.37-2.56)* |
| Childhood autism                                                                                                                                                                                                       |  | 570                   | 2 506  |  | 0.20 (0.19-0.22)*                             | 0.85 (0.80-0.89)* |
| Asperger’s syndrome                                                                                                                                                                                                    |  | 417                   | 2 088  |  | 0.15 (0.13-0.16)                              | 0.70 (0.64-0.77)  |
| ADHD                                                                                                                                                                                                                   |  | 3 105                 | 11 101 |  | 1.11 (1.07-1.15)*                             | 3.75 (3.62-3.87)* |
| ADHD-combined type                                                                                                                                                                                                     |  | 2 607                 | 9 902  |  | 0.93 (0.89-0.96)*                             | 3.34 (3.22-3.46)* |
| ADHD-inattentive type                                                                                                                                                                                                  |  | 625                   | 1 636  |  | 0.22 (0.21-0.24)*                             | 0.55 (0.49-0.61)  |
| ODD/CD                                                                                                                                                                                                                 |  | 561                   | 2 562  |  | 0.20 (0.18-0.22)                              | 0.86 (0.82-0.91)  |
| Attachment disorders                                                                                                                                                                                                   |  | 729                   | 1 479  |  | 0.26 (0.24-0.28)                              | 0.50 (0.46-0.54)  |
| Tic disorders                                                                                                                                                                                                          |  | 701                   | 2 895  |  | 0.25 (0.23-0.27)*                             | 0.98 (0.93-1.02)* |
| Abbreviations: OCD, obsessive-compulsive disorder; ADHD, attention-deficit/hyperactivity disorder; ODD/CD, oppositional defiant disorder/conduct disorder.                                                             |  |                       |        |  |                                               |                   |
| <sup>a</sup> All individuals born in Denmark 1995-2003, followed until 13 years of age or date of death, emigration or Dec 31, 2016, whichever came first.                                                             |  |                       |        |  |                                               |                   |
| <sup>b</sup> Measures the probability of being treated for the disorder before 13 years of age. Individuals with more than one disorder were included in the numerator for each of the separate disorders.             |  |                       |        |  |                                               |                   |
| <sup>c</sup> In this sample, 7.06% (7.00 - 7.13%) were diagnosed with a mental disorder before 13 years of age (n=40 766).                                                                                             |  |                       |        |  |                                               |                   |
| * The cumulative incidence estimated in this restricted cohort with complete follow-up of all individuals until age 13 years, was significantly different from the estimated cumulative incidence in the total sample. |  |                       |        |  |                                               |                   |

**eFigure 1.** Sex- and Age-Specific Incidence Rates and Cumulative Incidences for Organic Mental Disorders, Substance Use Disorders, Alcohol Abuse, and Cannabis Use

1

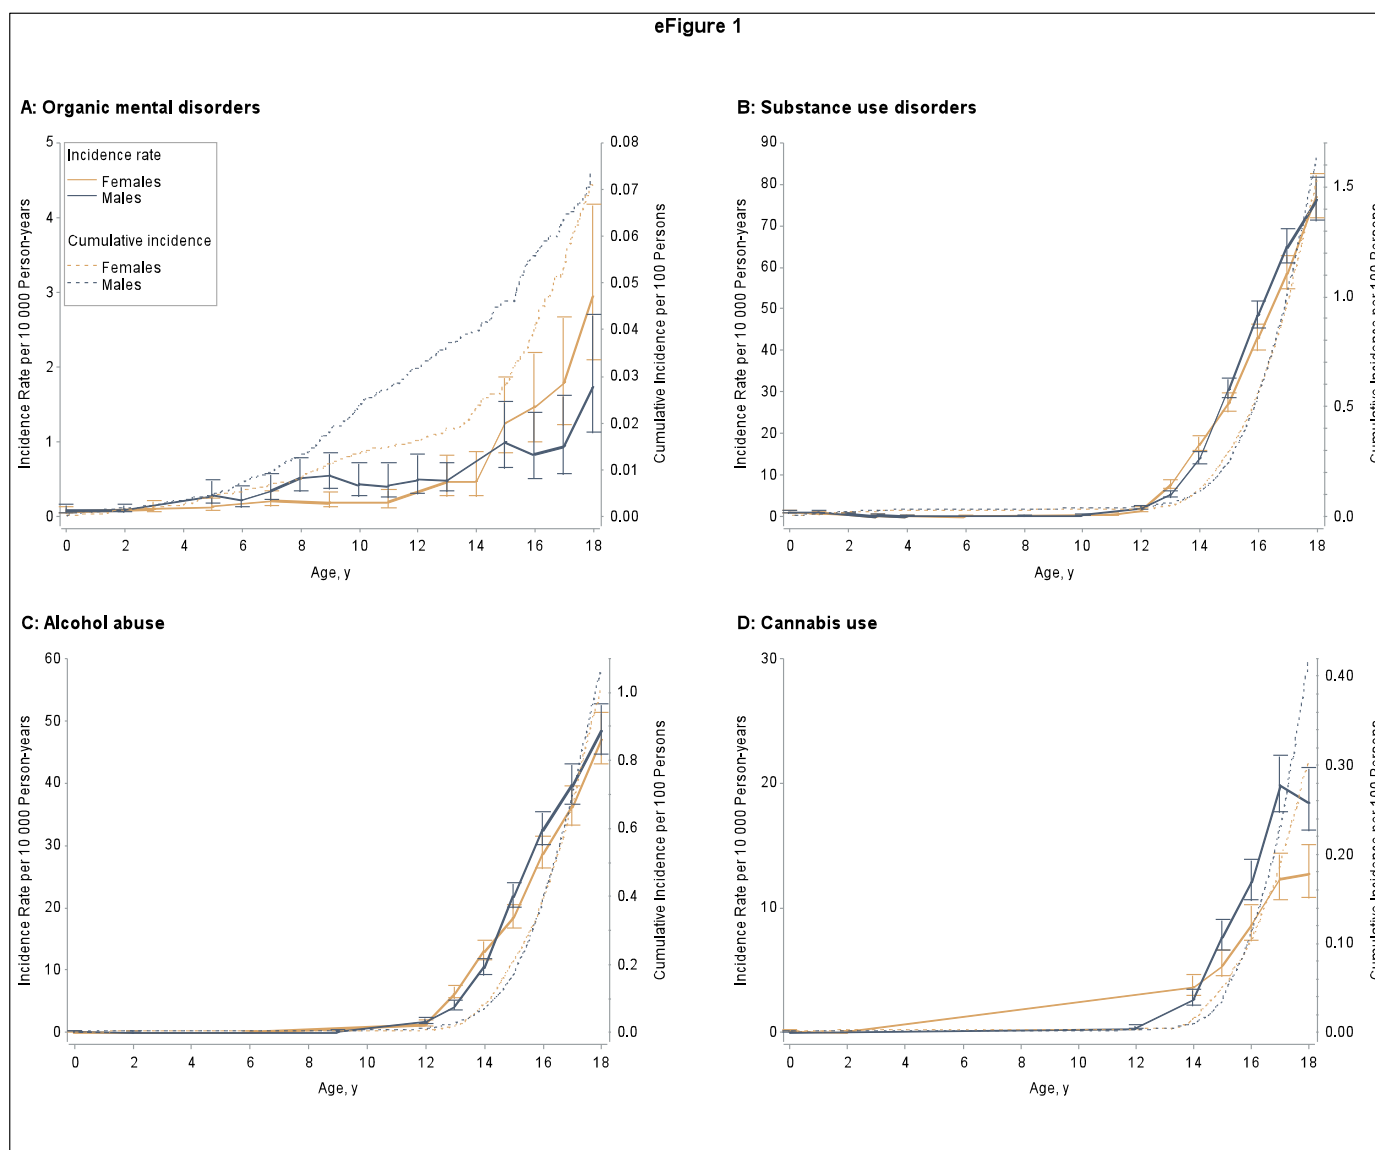

Organic mental disorders were defined as *ICD-10 Classification of Mental and Behavioral Disorders: Diagnostic Criteria for Research [ICD-10-DCR]*, codes F00-F09; any substance use disorders as *ICD-10-DCR* codes F10-F19; alcohol abuse as *ICD-10-DCR* codes F10; cannabis use as *ICD-10-DCR* codes F12. Error bars show the 95% CIs in designated age ranges. Owing to the large sample size, the 95% CIs for the cumulative incidences are very close to the estimates and are therefore not shown. The incidence rates measure the number of incident cases being diagnosed for the first time (with a mental disorder of interest) at different ages, per 10 000 person-years. The cumulative incidence measures the probability of being diagnosed with the disorder before a given age, per 100 persons. Because the cumulative incidences are estimated continuously with respect to age and the incidence rates are estimated in one-year age intervals, the abscissa for the cumulative incidence measures the exact age, whereas the abscissa for the incidence rates measures the lowest cutoff point for the age interval. Note that the y-axis scales differ by disorder to correspond to the range of observed outcomes.

**eFigure 2.** Sex- and Age-Specific Incidence Rates and Cumulative Incidences for Schizophrenia, Acute Psychoses, Bipolar Disorder, and Depressive Episode

1

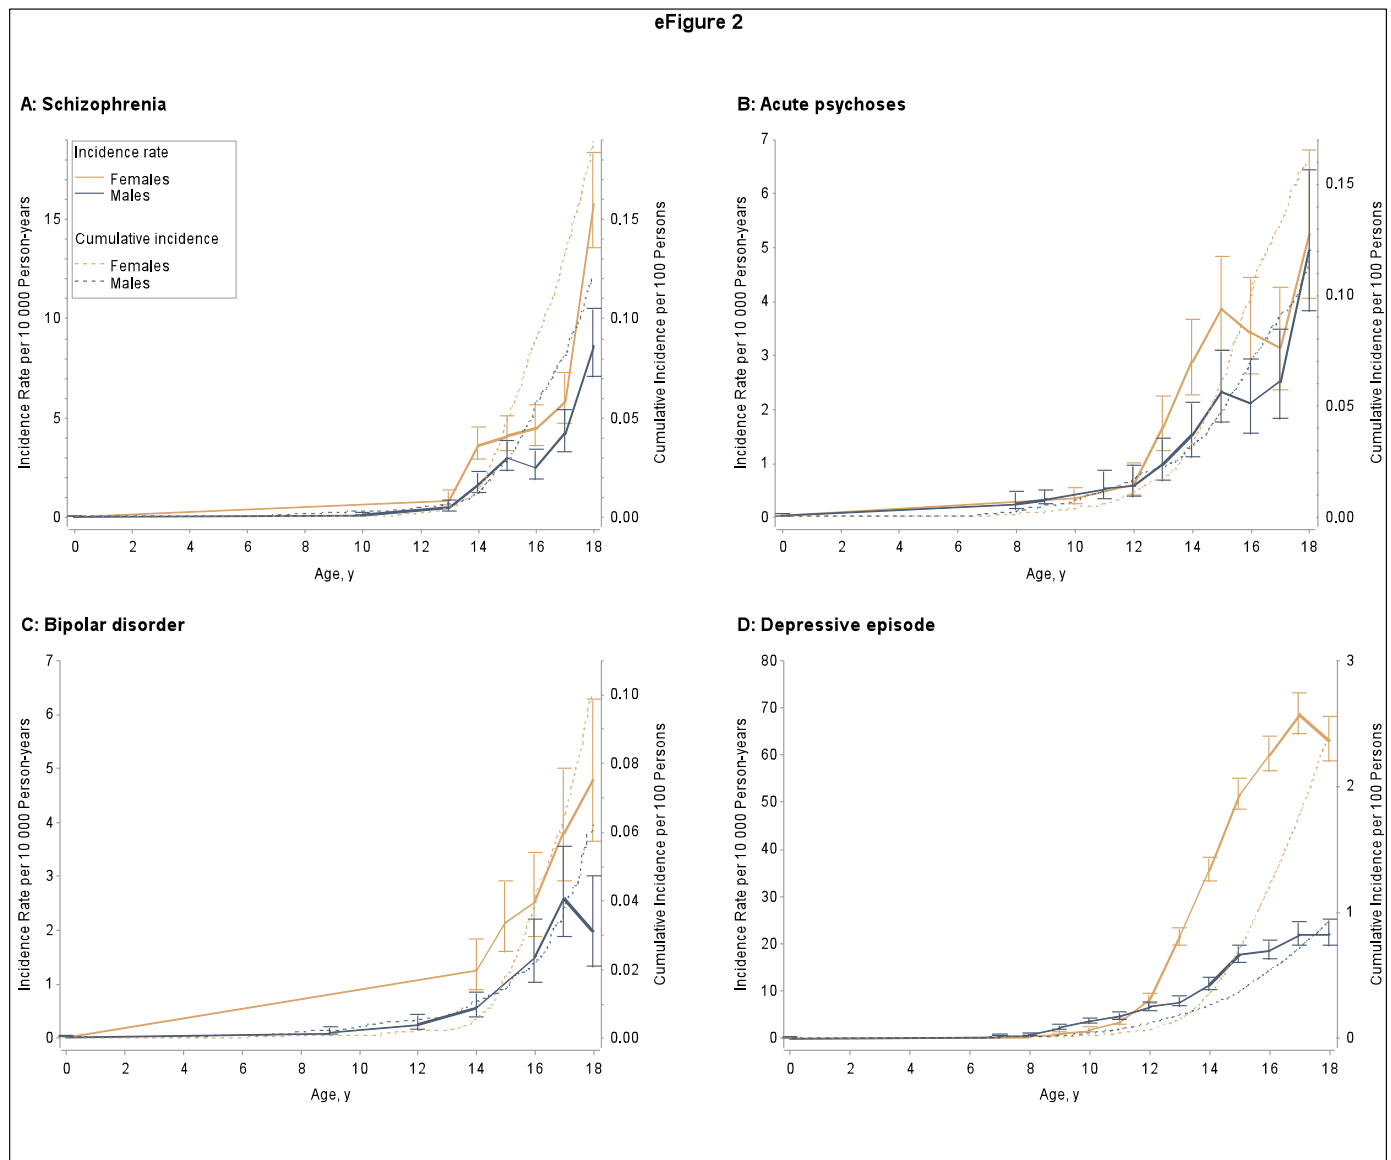

Schizophrenia was identified as *ICD-10-DCR codes F20*; acute psychoses as *ICD-10-DCR codes F23*; bipolar disorder as *ICD-10-DCR codes F30-F31*; depressive episode as *ICD-10-DCR codes F32-F33*. Error bars show the 95% CIs in designated age ranges. Owing to the large sample size, the 95% CIs for the cumulative incidences are very close to the estimates and are therefore not shown. The incidence rates measure the number of incident cases being diagnosed for the first time (with a mental disorder of interest) at different ages, per 10 000 person-years. The cumulative incidence measures the probability of being diagnosed with the disorder before a given age, per 100 persons. Because the cumulative incidences are estimated continuously with respect to age and the incidence rates are estimated in one-year age intervals, the abscissa for the cumulative incidence measures the exact age, whereas the abscissa for the incidence rates measures the lowest cutoff point for the age interval. Note that the y-axis scales differ by disorder to correspond to the range of observed outcomes.

**eFigure 3.** Sex- and Age-Specific Incidence Rates and Cumulative Incidences for Anorexia Nervosa, Bulimia, Personality Disorders and Other Developmental Disorders

1

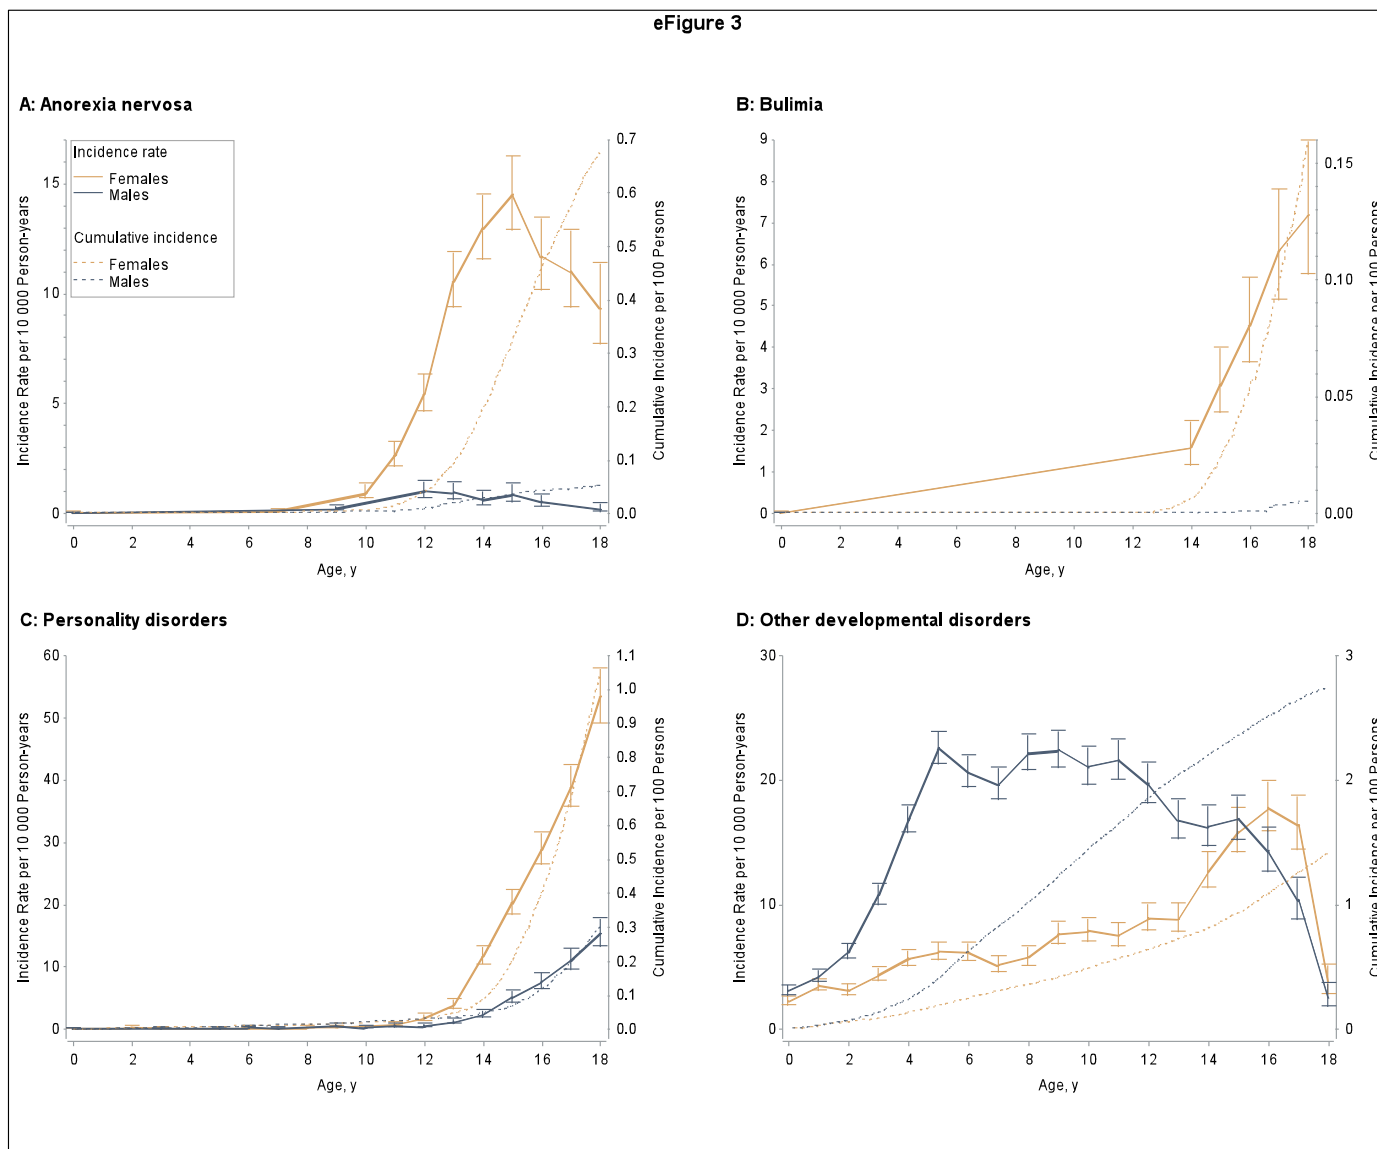

Anorexia nervosa was identified as *ICD-10-DCR codes F50.0*; bulimia as *ICD-10-DCR codes F50.2*; personality disorders as *ICD-10-DCR codes F60-F69*; other developmental disorders as *ICD-10-DCR codes F80-F83*.

Error bars show the 95% CIs in designated age ranges. Owing to the large sample size, the 95% CIs for the cumulative incidences are very close to the estimates and are therefore not shown. The incidence rates measure the number of incident cases being diagnosed for the first time (with a mental disorder of interest) at different ages, per 10 000 person-years. The cumulative incidence measures the probability of being diagnosed with the disorder before a given age, per 100 persons. Because the cumulative incidences are estimated continuously with respect to age and the incidence rates are estimated in one-year age intervals, the abscissa for the cumulative incidence measures the exact age, whereas the abscissa for the incidence rates measures the lowest cutoff point for the age interval. Note that the y-axis scales differ by disorder to correspond to the range of observed outcomes.

**eFigure 4.** Sex- and Age-Specific Incidence Rates and Cumulative Incidences for Childhood Autism, Asperger Syndrome, ADHD-Combined Type, and Attachment Disorders

1

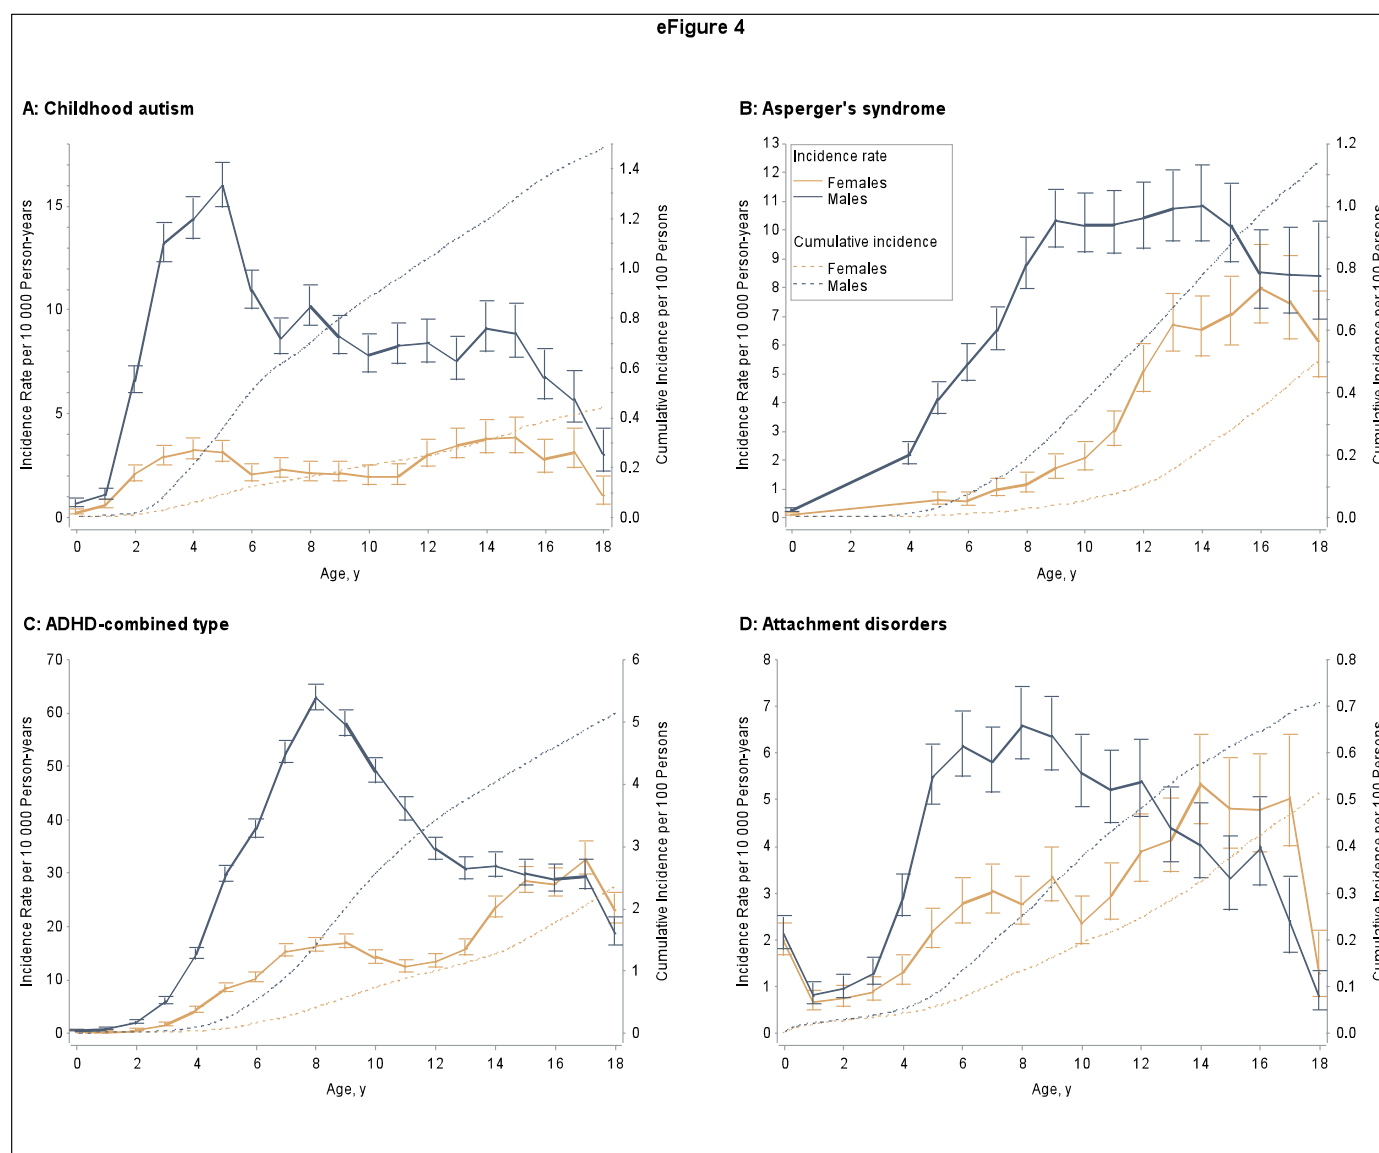

Childhood autism was identified as *ICD-10-DCR codes F84.0*; Asperger syndrome as *ICD-10-DCR codes F84.5*; ADHD-combined type as *ICD-10-DCR codes F90*; attachment disorders as *ICD-10-DCR codes F94.x excl. F94.0*.

Error bars show the 95% CIs in designated age ranges. Owing to the large sample size, the 95% CIs for the cumulative incidences are very close to the estimates and are therefore not shown. The incidence rates measure the number of incident cases being diagnosed for the first time (with a mental disorder of interest) at different ages, per 10 000 person-years. The cumulative incidence measures the probability of being diagnosed with the disorder before a given age, per 100 persons. Because the cumulative incidences are estimated continuously with respect to age and the incidence rates are estimated in one-year age intervals, the abscissa for the cumulative incidence measures the exact age, whereas the abscissa for the incidence rates measures the lowest cutoff point for the age interval. Note that the y-axis scales differ by disorder to correspond to the range of observed outcomes
